# Supplementary material
Source: PubMed Central journal article supplement (PMC6518895)
Supplement: 2018_204479-Disclosures_and_Contributions.pdf [file 2018_204479-Disclosures_and_Contributions.pdf]

Haematologica  
HAEMATOL/2018/204479  
Version 3

A prospective description of HIV-associated multicentric Castleman disease in Malawi

Tamiwe Tomoka, Matthew S. Painschab, Nathan D. Montgomery, Ryan Seguin, Maurice Mulenga, Bongani Kaimila, Edwards Kasonkanji, Takondwa Zuze, Richard Nyasosela, Ruth Nyirenda, Maria Chikasema, Blessings Tewete, Asekanadziwa Mtangwanika, Sarah Chiyoyola, Fred Chimzimu, Coxcilly Kampani, Yuri Fedoriw, and Satish Gopal

Disclosures: This work was supported by grants from the Fogarty International Center (K01TW009488) and National Cancer Institute (R21CA180815, U54CA190152, P20CA210285) to SG, the Medical Education Partnership Initiative (U2GPS001965), the Lineberger Comprehensive Cancer Center (P30CA016086), the University of North Carolina Center for AIDS Research (P30AI50410), and the AIDS Malignancy Consortium (UM1CA121947).

Contributions: TT, MSP, NDM, RS, YF, and SG designed the study, analyzed the data, and wrote the first draft. TT, NDM, MM, FC, CK, and YF supported pathologic diagnosis for all enrolled patients. MSP, BK, EK, TZ, RN, RN, MC, BT, AM, SC, and SG were responsible for all patient enrollment, clinical care, and follow-up. All authors contributed to the manuscript and approved the final version.
